# Supplementary material
Source: PubMed Central journal article supplement (PMC3788613)

A

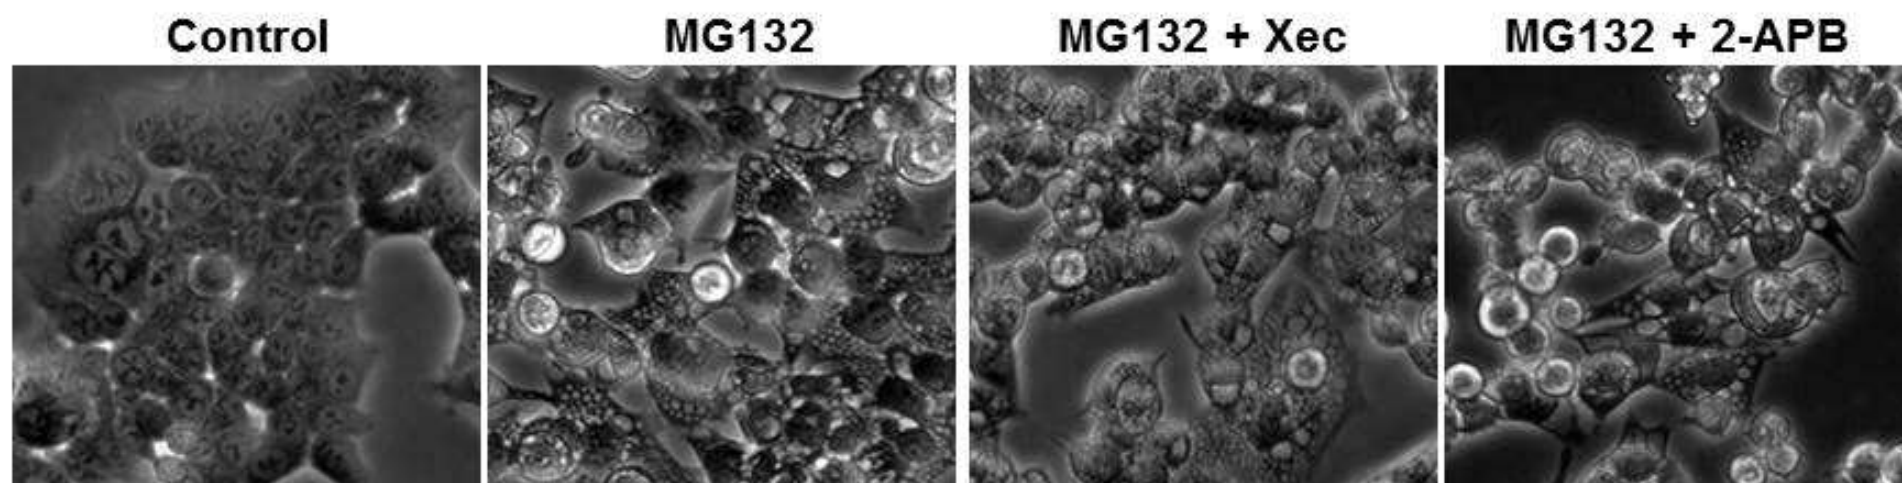

B

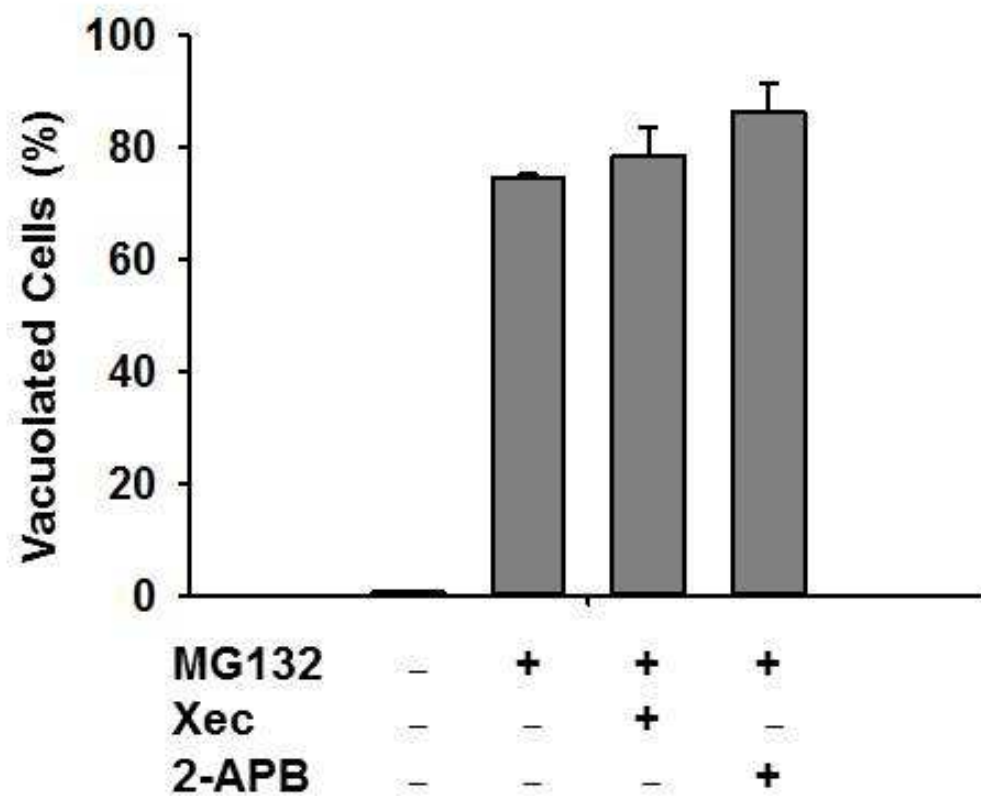

C

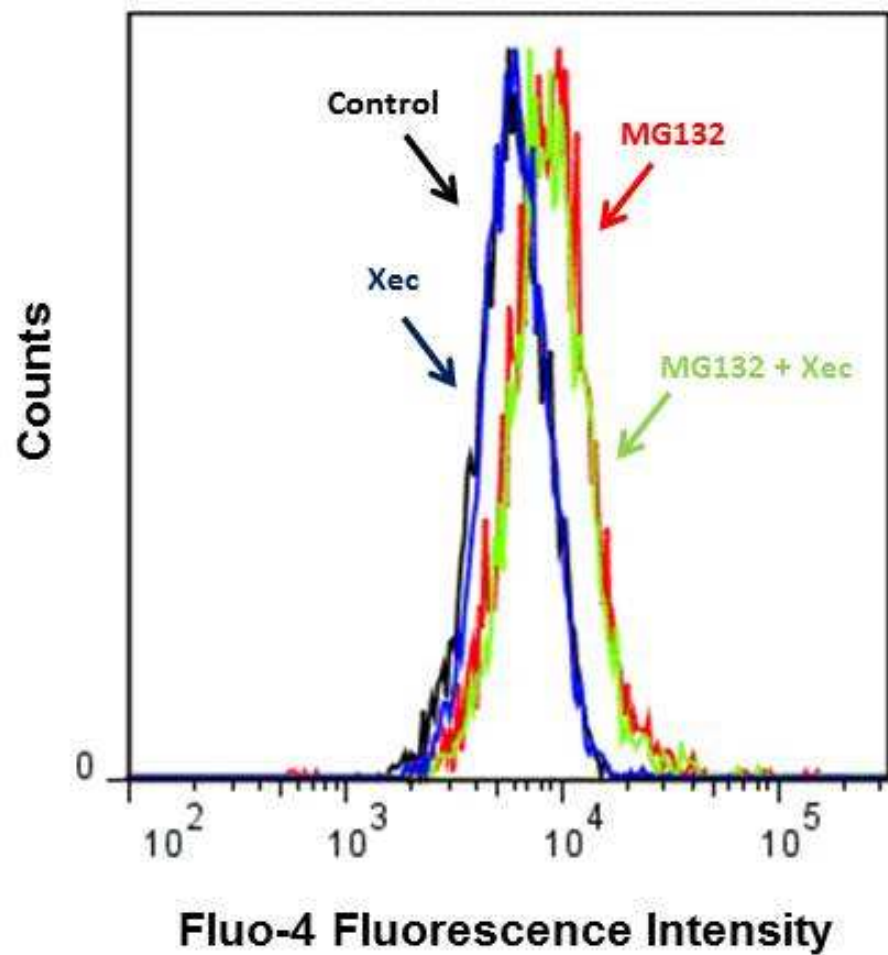

D

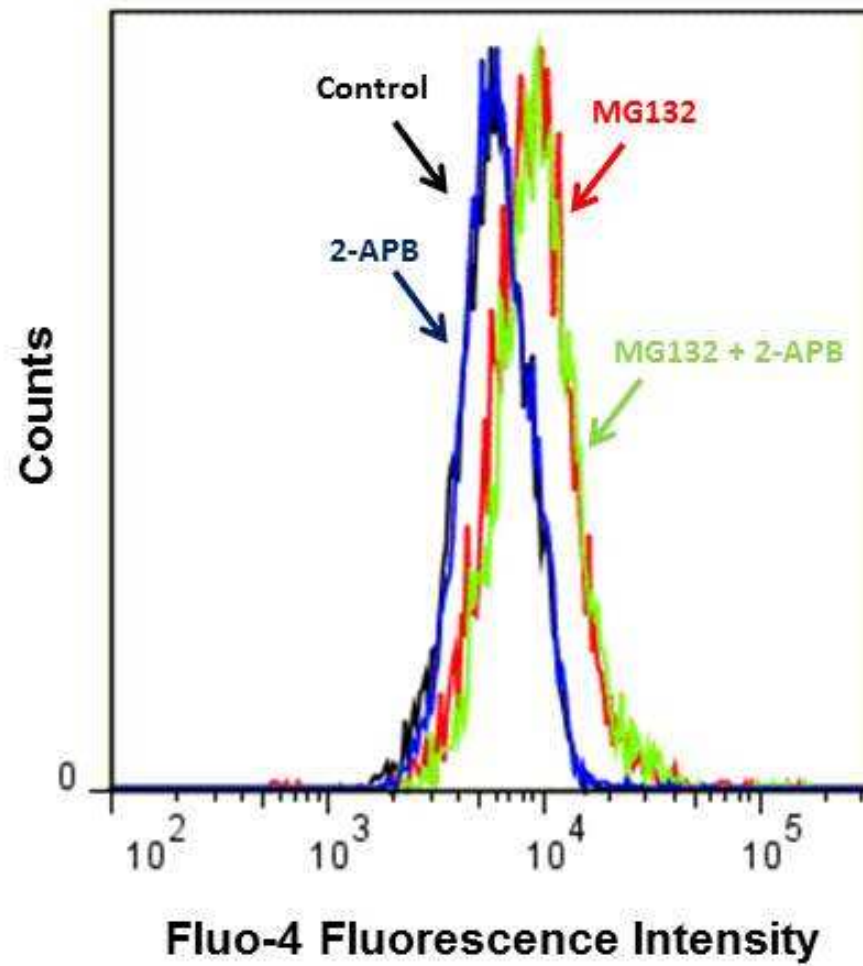

E

MG132

MG132+ EGTA  
(100  $\mu$ M)

MG132+ EGTA  
(200  $\mu$ M)

MG132+ EGTA  
(400  $\mu$ M)

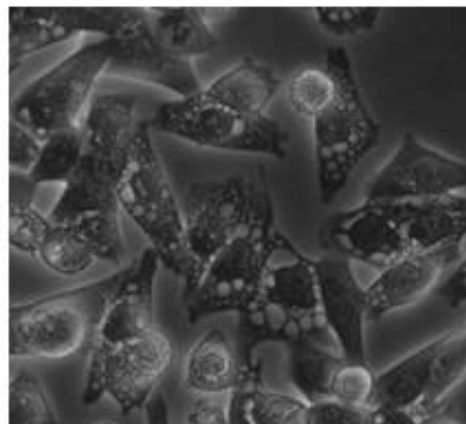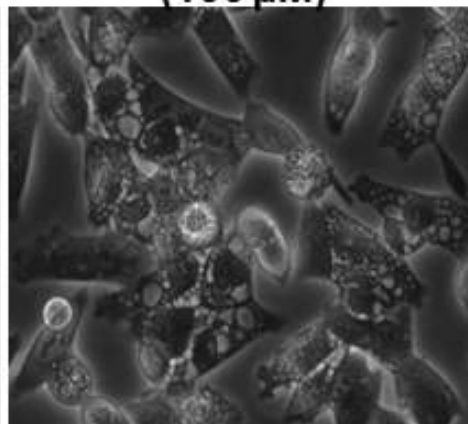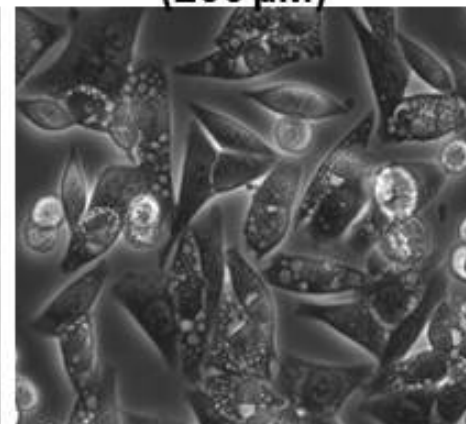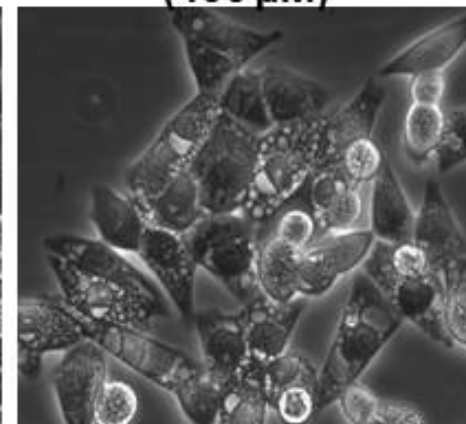

Supplement: NIHMS510333-supplement-11095_2013_1139_MOESM3_ESM.pdf [file NIHMS510333-supplement-11095_2013_1139_MOESM3_ESM.pdf]
